# Supplementary material
Source: publisher figshare collection journal article supplement (https://frontiersin.figshare.com/ndownloader/files/27944190)
Supplement: Supplementary file [file 27944190]

Table 4 Oscillations

| Paper Title          | Sun 2018                                                                                                             | Gurevicius 2004                                                                                                                                                                                                     | Shi 2018                                                                                                                                                                                                                                                           | Lensjo 2017                                                                                                                                                                                                                       | Hou 2017                                                                             | Faini 2018                                                                                                                                                                                          |
|----------------------|----------------------------------------------------------------------------------------------------------------------|---------------------------------------------------------------------------------------------------------------------------------------------------------------------------------------------------------------------|--------------------------------------------------------------------------------------------------------------------------------------------------------------------------------------------------------------------------------------------------------------------|-----------------------------------------------------------------------------------------------------------------------------------------------------------------------------------------------------------------------------------|--------------------------------------------------------------------------------------|-----------------------------------------------------------------------------------------------------------------------------------------------------------------------------------------------------|
| Brain Area           | Hippocampus (CA1)                                                                                                    | Hippocampus (CA1, dentate gyrus (DG))                                                                                                                                                                               | Hippocampus (CA1)                                                                                                                                                                                                                                                  | Visual cortex (V1, L 2/3)                                                                                                                                                                                                         | Visual cortex (V1)                                                                   | Visual cortex (V1)                                                                                                                                                                                  |
| Species              | Mouse                                                                                                                | Mouse                                                                                                                                                                                                               | Mouse                                                                                                                                                                                                                                                              | Rats                                                                                                                                                                                                                              | Mouse                                                                                | Mouse                                                                                                                                                                                               |
| Age                  | 6-8 weeks                                                                                                            | Adult (9-11 months)                                                                                                                                                                                                 | Adult (3 months)                                                                                                                                                                                                                                                   | Adult (4-6 months)                                                                                                                                                                                                                | 28-30 days                                                                           | Adult (>P70)                                                                                                                                                                                        |
| Sex                  | Both                                                                                                                 | Male                                                                                                                                                                                                                | Not specified                                                                                                                                                                                                                                                      | Male                                                                                                                                                                                                                              | Both                                                                                 | Male                                                                                                                                                                                                |
| PNN model            | Ch-ABC <i>in vitro</i><br>Hyaluronidase <i>in vitro</i>                                                              | Tenascin-R KO                                                                                                                                                                                                       | Ch-ABC and shBCAN                                                                                                                                                                                                                                                  | Ch-ABC                                                                                                                                                                                                                            | CSGalNAcT1 (key CS synthesizing enzyme)                                              | Ch-ABC                                                                                                                                                                                              |
| Time since treatment | 2 hr                                                                                                                 |                                                                                                                                                                                                                     | 1 day                                                                                                                                                                                                                                                              | 3-14 days                                                                                                                                                                                                                         |                                                                                      | 2-3 days                                                                                                                                                                                            |
| Preparation          | <i>In vitro</i>                                                                                                      | <i>In vivo</i> , awake freely behaving                                                                                                                                                                              | <i>In vivo</i> , CA1                                                                                                                                                                                                                                               | <i>In vivo</i> , awake freely behaving                                                                                                                                                                                            |                                                                                      | <i>In vivo</i> , anesthetized                                                                                                                                                                       |
| Behavior/Stimulus    | Spontaneous occurrence                                                                                               | Auditory gating paradigm (2 sharp clicks separated by interval)                                                                                                                                                     | Contextual fear conditioning                                                                                                                                                                                                                                       | Drifting gratings, monocular deprivation                                                                                                                                                                                          |                                                                                      | Visually-evoked response to different contrast levels and changes in power spectrum.                                                                                                                |
| Outcome              | Increased SWR occurrence frequency; no change in duration; increased SWR occurrence frequency; no change in duration | Same number of SWRs, increase by 100% of gamma power; decreased frequency of theta, same peak theta power; EEG power increased at 2-6, 14-20, and 20-40 Hz range; increased amplitude of auditory-evoked potentials | In either CA1 or ACC: decreased remote fear memory expression and decreased reconsolidation; theta oscillations increased 24 hr after fear conditioning. Ch-ABC decreased fear conditioning-induced theta activity; overexpression of HAPLN1 increased theta power | Increased spontaneous power in theta and low-gamma; no change in visual stimulus induced power; Ch-ABC increased ocular dominance plasticity; increased gamma power (40-55 Hz) immediately after MD, which disappeared after 1 hr | Calcium imaging showed reduced response to visual stimuli in PV but not non-PV cells | Decreased visually-evoked response amplitude to higher contrast; Ch-ABC increased resting state gamma (40-80Hz) power as well as during 100% contrast checkerboard stimulation (broadband increase) |

Table 4 Oscillations

| Paper Title          | Thompson 2018                                                                       | Cabungcal 2013                                            | Steullet 2014                                  | Carcellar 2020                                                                            | Christensen 2021                                                                                                                                                                                                                                                                                                                      |
|----------------------|-------------------------------------------------------------------------------------|-----------------------------------------------------------|------------------------------------------------|-------------------------------------------------------------------------------------------|---------------------------------------------------------------------------------------------------------------------------------------------------------------------------------------------------------------------------------------------------------------------------------------------------------------------------------------|
| Brain Area           | Visual cortex (V2L for Ch-ABC + record) and BLA (record only)                       | Anterior cingulate cortex (ACC)                           | Anterior cingulate cortex (ACC)                | Medial prefrontal cortex (mPFC)                                                           | Medial entorhinal cortex (MEC), hippocampus (CA1)                                                                                                                                                                                                                                                                                     |
| Species              | rats                                                                                | Gclm KO mouse                                             | Mouse                                          | Mouse                                                                                     | rats                                                                                                                                                                                                                                                                                                                                  |
| Age                  | Not specified                                                                       | Adult (90 days)                                           | Adult (3-5 months)                             | Adult (3 months)                                                                          | 3-8 months                                                                                                                                                                                                                                                                                                                            |
| Sex                  | Male                                                                                | Not specified                                             | Not specified                                  | Male                                                                                      | Male                                                                                                                                                                                                                                                                                                                                  |
| PNN model            | Ch-ABC                                                                              | Ch-ABC                                                    | Ch-ABC                                         | Ch-ABC                                                                                    | Ch-ABC                                                                                                                                                                                                                                                                                                                                |
| Time since treatment | > 7 days                                                                            | Not specified                                             | 3 days                                         | 4 days                                                                                    | 3-14 days                                                                                                                                                                                                                                                                                                                             |
| Preparation          | <i>In vivo</i> , freely behaving                                                    | <i>In vitro</i>                                           | <i>In vitro</i>                                | <i>In vivo</i> , anesthetized                                                             | <i>In vivo</i> , freely behaving                                                                                                                                                                                                                                                                                                      |
| Behavior/Stimulus    | Fear conditioning and context re-exposure                                           | carbachol, kainate, quinpirole                            | carbachol, kainate, quinpirole                 | Tail pinch                                                                                | Arena exploration familiar and novel                                                                                                                                                                                                                                                                                                  |
| Outcome              | Decreased theta coherence during memory retrieval; no impact on cue-evoked response | Increased power of high-frequency oscillations-beta/gamma | Increased power of high-frequency oscillations | Decreased high-frequency >70Hz power; decreased modulation index for theta-gamma coupling | Theta power increased and peak frequency decreased; theta peak frequency decreased during initial novel exploration but continued to increase during prolonged exploration-more so in the control group; this effect not mediated by running speed modulation; hippocampal theta power increased, although treatment localized to MEC |
